# Supplementary material for: Mitochondrial Methionyl-tRNA Formyltransferase Deficiency Alleviates Metaflammation by Modulating Mitochondrial Activity in Mice
Source: MDPI journal article supplement (doi:10.3390/ijms24065999), 2023-03-22
Supplement: s1 [file s1]

# Mitochondrial Methionyl-tRNA Formyltransferase Deficiency Alleviates Metaflammation by Modulating Mitochondrial Activity in Mice

Xiaoxiao Sun <sup>1</sup>, Suyuan Liu <sup>1</sup>, Jiangxue Cai <sup>1</sup>, Miaoxin Yang <sup>1</sup>, Chenxuan Li <sup>1</sup>, Meiling Tan <sup>1</sup>  
and Bin He <sup>1,2,\*</sup>

<sup>1</sup> Key Laboratory of Animal Physiology & Biochemistry, Ministry of  
Agriculture and Rural Affairs, College of Veterinary Medicine, Nanjing  
Agricultural University, Nanjing 210095, China

<sup>2</sup> MOE Joint International Research Laboratory of Animal Health & Food  
Safety, Nanjing Agricultural University, Nanjing 210095, China

\* Correspondence: heb@njau.edu.cn; Tel.: +86-25-84396413

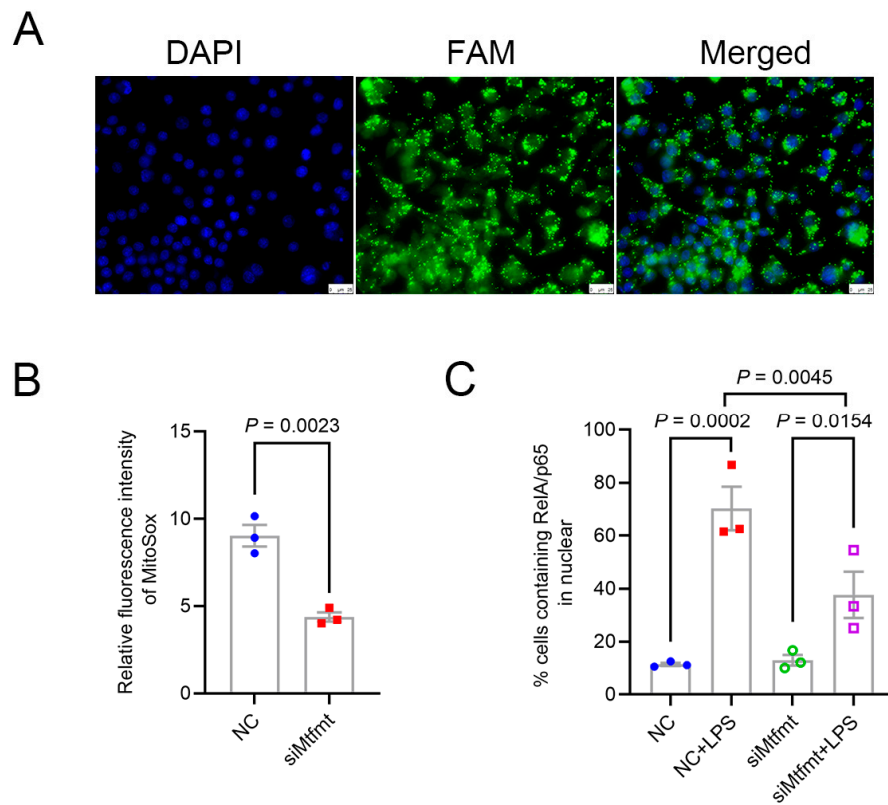

Figure S1. (A) Fluorescent images of Kupffer cells after 6 hours of transfection with siRNA conjugated FAM. (B) Quantification of fluorescence intensity of MitoSOX, n=3. (C) Quantification of P65 nuclear localization, n=3.

**Table S1. The primer sequences of the target genes**

| Gene                          | Forward                | Reverse                 |
|-------------------------------|------------------------|-------------------------|
| <i>Mtfmt</i>                  | TCGCTATCCCCCAAAGGACT   | CACTCAAAAGCCGGCCAAAG    |
| <i>IL-1<math>\beta</math></i> | CTTCAGGCAGGCAGTATC     | CAGCAGGTTATCATCATCATC   |
| <i>IL-6</i>                   | GACAAAGCCAGAGTCCTTCAGA | TGTGACTCCAGCTTATCTCTTGG |
| <i>TNF<math>\alpha</math></i> | GACGTGGAAGTGGCAGAAGA   | ACTGATGAGAGGGAGGCCAT    |
| <i>ND6</i>                    | TATTGCCGCTACCCCAATCC   | GGGGGATGTTGGTTGTGTTTG   |
| <i>ND1</i>                    | CGTCCCCATTCTAATCGCCA   | ATGGCGTCTGCAAATGGTTG    |
| <i>COX1</i>                   | TCGGAGCCCCAGATATAGCA   | TTCCGGCTAGAGGTGGGTA     |
| <i>GAPDH</i>                  | ACCCTTAAGAGGGATGCTGC   | CCCAATACGGCCAAATCCGT    |

**Table S2. The sequences of *Mtfmt* siRNA**

| siRNA                | Sense                 | Antisense             |
|----------------------|-----------------------|-----------------------|
| <i>Mtfmt</i> siRNA 1 | GAGGCUCUUAUUCUAAAUTT  | AUUUAAGAAUAAGAGCCUCTT |
| <i>Mtfmt</i> siRNA 2 | GCGUACGAUUAUGCAAAUTT  | AUUUGCAUAAUCGUUACGCTT |
| <i>Mtfmt</i> siRNA 3 | GCCCGAAAGUCUGAACAAUTT | AUUGUUCAGACUUUCGGGCTT |
